# Supplementary material for: Relapsed diffuse large B-cell lymphoma present different genomic profiles between early and late relapses
Source: PubMed Central journal article supplement (PMC5356640; doi:10.18632/oncotarget.9793), 2016-06-02
Supplement: oncotarget-07-83987-s001.pdf [file oncotarget-07-83987-s001.pdf]

## Relapsed diffuse large B-cell lymphoma present different genomic profiles between early and late relapses

### Supplementary Material

**Supplemental table 1.** List of the 148 genes with differential CNVs distribution among early-relapsed and late-relapsed DLBCLs.

| Chr. Band | Gene          | Gene full name                                   | Description/function                       |
|-----------|---------------|--------------------------------------------------|--------------------------------------------|
| 1p21      | AMY2A         | Amylase, Alpha 2A                                | Member of the alpha-amylase family         |
| 1p35      | RP4-591L5.2   | ---                                              | LncRNA                                     |
| 1p35      | RP1-65J11.5   | ---                                              | Antisense RNA                              |
| 1q23      | RP11-367J7.4  | ---                                              | Pseudogene                                 |
| 1q32      | RP11-168O16.1 | ---                                              | Antisense RNA                              |
| 1q42      | RP4-580N22.2  | ---                                              | LncRNA                                     |
| 1q42      | MTND5P19      | MT-ND5 Pseudogene 19                             | LncRNA                                     |
| 1q42      | MTND4P10      | MT-ND4 Pseudogene 10                             | LncRNA                                     |
| 1q42      | MTND6P14      | MT-ND6 Pseudogene 14                             | Pseudogene                                 |
| 1q42      | RP5-827C21.2  | ---                                              | Antisense RNA                              |
| 1q43      | RP11-193H5.2  | ---                                              | Pseudogene                                 |
| 1q43      | RP11-567G24.1 | ---                                              | Pseudogene                                 |
| 1q43      | RP11-527D7.1  | ---                                              | LncRNA                                     |
| 1q43      | RNU6-1139P    | ---                                              | snRNA                                      |
| 1q44      | HNRNPU-AS1    | HNRNPU Antisense RNA 1                           | Antisense RNA                              |
| 1q44      | FABP7P1       | Fatty acid binding protein 7, brain pseudogene 1 | Pseudogene                                 |
| 1q44      | RNU6-947P     | RNA, U6 Small Nuclear 947, Pseudogene            | Pseudogene                                 |
| 1q44      | HNRPU         | Heterogeneous Nuclear Ribonucleoprotein U        | pre-mRNA processing                        |
| 1q44      | OR2T34        | Olfactory receptor, family 2, subfam. T, mb 34   | G-protein-coupled olfactory receptor       |
| 1q44      | OR2AK2        | Olfactory receptor, family 2, subfam. AK, mb 2   | G-protein-coupled olfactory receptor       |
| 2p11      | IGKV3D-7      | Immunoglobulin kappa variable 3D-7               | BCR assembly                               |
| 2q23      | AC079790.2    | ---                                              | Antisense RNA                              |
| 2q24      | GALNT5        | N-Acetylgalactosaminyltransferase 5              | O-linked oligosaccharide biosynthesis      |
| 2q24      | AC092625.1    | ---                                              | LncRNA                                     |
| 2q24      | AC019186.1    | ---                                              | LncRNA                                     |
| 2q24      | AC009227.2    | ---                                              | Antisense RNA                              |
| 2q31      | EXTL2P1       | Exostoses (multiple)-like 2 pseudogene 1         | Pseudogene                                 |
| 2q31      | NFE2L2        | Nuclear factor (erythroid-derived 2)-like 2      | Transcriptional regulator                  |
| 2q32      | RN7SL267P     | RNA, 7SL, cytoplasmic 267                        | Pseudogene                                 |
| 2q33      | RNU6-31P      | RNA, U6 Small Nuclear 31                         | snRNA                                      |
| 2q33      | AC007163.9    | ---                                              | Pseudogene                                 |
| 2q33      | MTND4P29      | MT-ND4 Pseudogene 29                             | Pseudogene                                 |
| 2q33      | MTND5P31      | MT-ND5 Pseudogene 31                             | Pseudogene                                 |
| 2q33      | SNORA1        | Small nucleolar RNA, H/ACA box 1                 | Novel snoRNA                               |
| 2q33      | AC007879.6    | ---                                              | LncRNA                                     |
| 2q34      | MEAF6P1       | MYST/Esa1-associated factor 6 pseudogene 1       | Pseudogene                                 |
| 2q35      | AC053503.11   | ---                                              | Antisense RNA                              |
| 2q35      | AC010136.2    | ---                                              | Antisense RNA                              |
| 2q35      | CXCR2P1       | Chemokine Receptor 2 Pseudogene 1                | Pseudogene                                 |
| 2q37      | AC017104.2    | ---                                              | LncRNA                                     |
| 2q37      | PP14571       | ---                                              | LncRNA                                     |
| 2q37      | MTERF4        | Mitochondrial Transcription Termination Factor 4 | Regulator of mitochondrial gene expression |
| 2q37      | UBE2F-SCLY    | UBE2F-SCLY Readthrough                           | MHC class I mediated antigen processing    |
| 2q37      | C2orf82       | Chromosome 2 Open Reading Frame 82               | ---                                        |
| 2q37      | AC104667.3    | ---                                              | Antisense RNA                              |
| 3p22      | AC011816.1    | ---                                              | Pseudogene                                 |
| 3q13      | RP11-10G15.4  | ---                                              | Pseudogene                                 |
| 3q13      | MTND5P16      | MT-ND5 pseudogene 16                             | LncRNA                                     |
| 3q21      | GS1-388B5.8   | ---                                              | Pseudogene                                 |
| 3q21      | RNA5SP58      | RNA, 5S Ribosomal Pseudogene 57                  | Pseudogene                                 |
| 3q22      | HSPA8P19      | Heat Shock 70kDa Protein 8 Pseudogene 19         | Pseudogene                                 |
| 3q22      | PRR23B        | Proline Rich 23B                                 | ---                                        |
| 3q23      | ACTG1P1       | Actin Gamma 1 Pseudogene 1                       | Pseudogene                                 |
| 3q23      | RNU1-100P     | RNA, U1 Small Nuclear 100                        | Pseudogene                                 |
| 3q23      | RP11-68L1.2   | ---                                              | Antisense RNA                              |
| 3q23      | CLSTN2-AS1    | CLSTN2 antisense RNA 1                           | Antisense RNA                              |
| 3q25      | RP11-64D22.5  | ---                                              | LncRNA                                     |
| 3q25      | RP11-451G4.3  | ---                                              | LncRNA                                     |

|       |                 |                                                              |                                             |
|-------|-----------------|--------------------------------------------------------------|---------------------------------------------|
| 3q25  | AADAC           | Arylacetamide deacetylase                                    | Microsomal arylacetamide deacetylase        |
| 3q25  | PA2G4P4         | Proliferation-Associated 2G4 Pseudogene 4                    | Pseudogene                                  |
| 3q25  | RPL21P42        | ribosomal protein L21 pseudogene 42                          | Pseudogene                                  |
| 3q25  | PLCH1-AS1       | PLCH1 antisense RNA 1                                        | Antisense RNA                               |
| 3q25  | RP11-103G8.2    | ERICH6 antisense RNA 1                                       | Antisense RNA                               |
| 3q25  | IQCJ-SCHIP1-AS1 | IQCJ-SCHIP1 Readthrough Antisense RNA 1                      | Antisense RNA                               |
| 3q26  | HMG1P8          | high mobility group nucleosome binding domain 1 pseudogene 8 | LncRNA                                      |
| 3q26  | RP11-152C17.1   | ---                                                          | LncRNA                                      |
| 3q26  | RP11-298O21.2   | ---                                                          | LncRNA                                      |
| 3q26  | RP11-298O21.6   | ---                                                          | LncRNA                                      |
| 3q26  | RP11-816B4.1    | ---                                                          | Pseudogene                                  |
| 3q26  | AC007620.3      | ---                                                          | Antisense RNA                               |
| 3q27  | RNU6-1105P      | RNA, U6 Small Nuclear 1105                                   | Pseudogene                                  |
| 3q27  | RP11-573D15.2   | ---                                                          | LncRNA                                      |
| 3q27  | DVL3            | Dishevelled, dsh homolog 3                                   | Regulation of cell proliferation            |
| 3q27  | EIF2B5-AS1      | EIF2B5 antisense RNA 1                                       | Antisense RNA                               |
| 3q28  | GCNT1P3         | glucosaminyl transferase 1, core2 pseudogene 3               | Pseudogene                                  |
| 3q29  | CPN2            | Carboxypeptidase N, Polypeptide 2                            | Carboxypeptidase                            |
| 3q29  | SENP5           | SUMO1/sentrin specific peptidase 5                           | Post-translational modification of proteins |
| 3q29  | MUC20           | Mucin 20, Cell Surface Associated                            | Glycoprotein of mucous barrier              |
| 3q29  | HES1            | Hairy enhancer of split 1                                    | Transcription factor                        |
| 3q29  | RP11-135A1.2    | ---                                                          | Antisense RNA                               |
| 4p13  | RN7SL691P       | RNA, 7SL, Cytoplasmic 691                                    | Pseudogene                                  |
| 6p21  | RP5-973N23.4    | ---                                                          | LncRNA                                      |
| 6p21  | CSNK2B/CK2B     | Casein kinase 2, beta subunit                                | Regulation of programmed cell death         |
| 6p21  | BTNL2           | Butyrophilin-Like 2                                          | Negative regulation of T-cell proliferation |
| 6p21  | CCHCR1          | Coiled-Coil Alpha-Helical Rod Protein 1                      | Regulation of keratinocyte proliferation    |
| 6p21  | HIST1H1T        | Histone Cluster 1, H1t                                       | Epigenetic regulation of transcription      |
| 6p21  | HLA-DRA         | MHC complex, Class II, DR Alpha                              | Antigen presentation                        |
| 6p22  | RP3-369A17.2    | ---                                                          | Pseudogene                                  |
| 6p22  | VN1R11P         | Vomer nasal 1 Receptor 11 Pseudogene                         | Pseudogene                                  |
| 6p22  | MCCD1P1         | Mitochondrial coiled-coil domain 1 pseudogene 1              | Pseudogene                                  |
| 6p22  | HIST1H2BC       | Histone Cluster 1, H2bc                                      | Epigenetic regulation of transcription      |
| 6p22  | HIS1H2AK        | Histone Cluster 1, H2ak                                      | Epigenetic regulation of transcription      |
| 6p22  | KAAG1           | Kidney Associated Antigen 1                                  | ---                                         |
| 6p24  | RP11-69L16.4    | ---                                                          | Antisense RNA                               |
| 6p25  | SERPINB1        | Serpin Peptidase Inhibitor, Class B, Mb1                     | Proteinase inhibition                       |
| 6q12  | RP11-74E24.2    | Zinc finger CCCH-Type Domain-Containing-Like                 | Pseudogene                                  |
| 6q13  | KHDC1           | KH homology domain containing 1                              | Predicted membrane protein                  |
| 6q21  | RP11-249L21.4   | ---                                                          | Pseudogene                                  |
| 6q25  | AIRN            | Antisense of IGF2R Non-Protein Coding RNA                    | Regulation of transcription                 |
| 6q25  | RP3-403L10.3    | ---                                                          | Antisense RNA                               |
| 7p22  | GPR146          | G Protein-Coupled Receptor 146                               | G protein coupled receptor                  |
| 7p22  | AC073343.13     | ---                                                          | Antisense RNA                               |
| 7q11  | ABHD11          | Abhydrolase domain containing 11                             | ---                                         |
| 7q11  | STX1A           | Syntaxin 1A                                                  | Docking of synaptic vesicles                |
| 7q21  | AC079781.7      | ---                                                          | Pseudogene                                  |
| 11p15 | ART5            | ADP-Ribosyltransferase 5                                     | ARG-specific ADP-ribosyltransferase         |
| 12p13 | PRH1            | Proline-Rich Protein HaeIII Subfamily 1                      | Inhibition of crystal calcium phosphates    |
| 12p13 | C1R             | Complement Component 1, R Subcomponent                       | Complement activation                       |
| 12p13 | PTMS            | Parathyrosin                                                 | Inhibition of linkage of H1 to chromatin    |
| 12q12 | RP11-313F23.3   | ---                                                          | LncRNA                                      |
| 12q12 | CLUHP8          | clustered mitochondria homolog pseudogene 8                  | Pseudogene                                  |
| 12q14 | RAB11AP2        | RAB11A, member RAS oncogene family pseudogene 2              | Pseudogene                                  |
| 12q22 | PGAM1P5         | Phosphoglycerate Mutase 1 Pseudogene 5                       | Pseudogene                                  |
| 12q23 | RNA5SP371       | RNA, 5S Ribosomal Pseudogene 371                             | Pseudogene                                  |
| 12q24 | RP11-968O1.5    | ---                                                          | Sense overlapping                           |
| 12q24 | RP11-428I12.1   | ---                                                          | Pseudogene                                  |
| 12q24 | RP11-572C21.1   | ---                                                          | LncRNA                                      |
| 12q24 | RP11-1028N23.3  | ---                                                          | LncRNA                                      |
| 12q24 | RP11-121J20.1   | ---                                                          | LncRNA                                      |
| 12q24 | DIABLO          | Diablo, IAP-Binding Mitochondrial Protein                    | Apoptosis promotion                         |
| 12q24 | LRRC43          | Leucine Rich Repeat Containing 43                            | ---                                         |
| 12q24 | RP11-64B16.4    | ---                                                          | Antisense RNA                               |
| 13q13 | EXOSC8          | Exosome Component 8                                          | Transcriptional regulation                  |
| 14q11 | AE000660.4      | ---                                                          | Pseudogene                                  |
| 14q11 | OR4Q3           | Olfactory receptor, family 4, subfam. Q, mb 3                | G-protein-coupled olfactory receptor        |
| 14q11 | TRAV-26-1       | T Cell Receptor Alpha Variable 26-1                          | TCR assembly                                |
| 14q11 | TRAJ10          | T Cell Receptor Alpha Joining 10                             | TCR assembly                                |

|       |                      |                                            |                                                            |
|-------|----------------------|--------------------------------------------|------------------------------------------------------------|
| 14q11 | <i>TRAJ13</i>        | T Cell Receptor Alpha Joining 13           | TCR assembly                                               |
| 14q12 | <i>RP11-468E2.6</i>  | ---                                        | ---                                                        |
| 14q32 | <i>HOMER2P1</i>      | Homer Scaffolding Protein 2 Pseudogene 1   | Pseudogene                                                 |
| 14q32 | <i>IGHVIII-2-1</i>   | Immunoglobulin Heavy Variable (III)-2-1    | BCR assembly                                               |
| 14q32 | <i>IGHVIII-16-1</i>  | Immunoglobulin Heavy Variable (III)-16-1   | BCR assembly                                               |
| 14q32 | <i>DCAF11</i>        | DDB1 And CUL4 Associated Factor 11         | Assembly of the DDB1–CUL4A ubiquitin ligase                |
| 15q15 | <i>CATSPER2</i>      | Cation Channel, Sperm Associated 2         | Sperm motility and male fertility                          |
| 15q25 | <i>RP11-182J1.14</i> | ---                                        | Pseudogene                                                 |
| 16p13 | <i>NARFL</i>         | Nuclear prelamin A recognition factor-like | Modulation of hypoxia-inducible factor-1 $\alpha$ activity |
| 16q22 | <i>HAS3</i>          | Hyaluronan Synthase 3                      | Synthesis of glycosaminoglycan hyaluronan                  |
| 16q22 | <i>CDH16</i>         | Cadherin 16                                | Ca <sup>2+</sup> -dependent glycoprotein                   |
| 16q22 | <i>CLEC18B</i>       | C-Type Lectin Domain Family 18, Member B   | ---                                                        |
| 17p11 | <i>LGALS9C</i>       | Lectin, Galactoside-Binding, Soluble, 9C   | Regulation of immune response                              |
| 19p13 | <i>LRG1</i>          | Leucine-rich alpha-2-glycoprotein 1        | Signal transduction, and cell adhesion                     |
| 19p13 | <i>ZNF414</i>        | Zinc Finger Protein 414                    | Transcriptional regulation                                 |
| 19p13 | <i>AC008686.1</i>    | ---                                        | Uncharacterized protein                                    |
| 22q12 | <i>RP5-1170K4.7</i>  | ---                                        | Antisense RNA                                              |
| 22q13 | <i>RN7SKP252</i>     | ---                                        | misc RNA                                                   |
| 22q13 | <i>RPL35P8</i>       | Ribosomal Protein L35 Pseudogene 8         | Pseudogene                                                 |
| 22q13 | <i>OGFRP1</i>        | opioid growth factor receptor pseudogene 1 | LncRNA                                                     |
| 22q13 | <i>ADSL</i>          | Adenylosuccinate lyase                     | <i>De novo</i> purine biosynthesis                         |

# Supplemental figures

## Observed distance *versus* expected distance

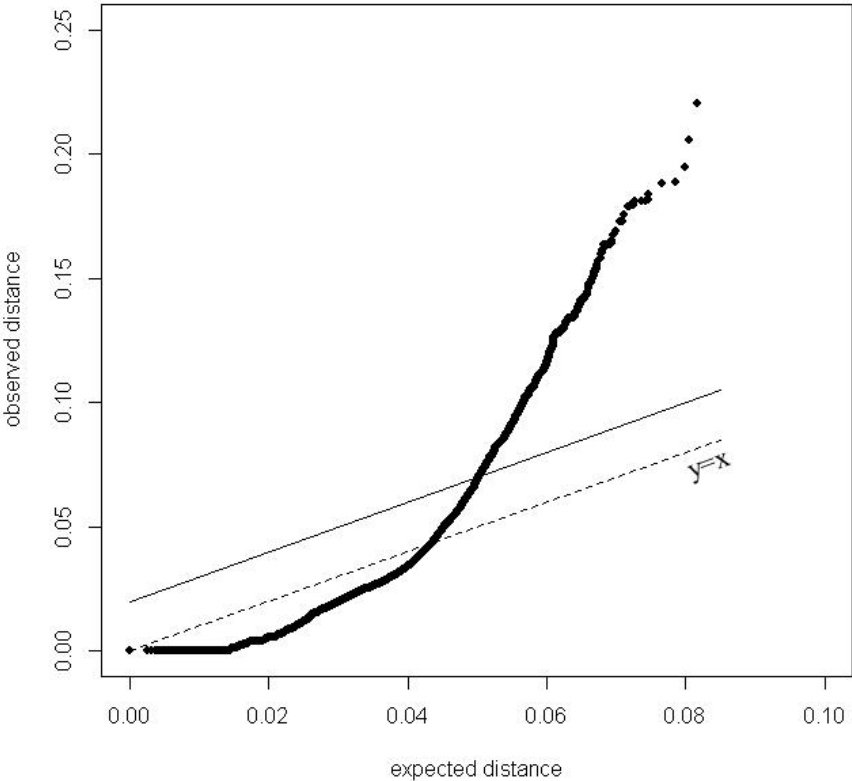

**Supplemental Figure 1: observed distance versus expected distance using the permutation-based SAM method.** One hundred and forty-eight genes presented with an observed distance superior to the expected distance, with a false discovery rate < 0.05.
